# Supplementary material
Source: PubMed Central journal article supplement (PMC11028760)
Supplement: 262_2016_1893_MOESM1_ESM.pdf [file 262_2016_1893_MOESM1_ESM.pdf]

# Supplementary Table S1: CEA-specific T-cell responses post- vs. pre-vaccination

| Patient     | Cohort | CD4 <sup>+</sup> T cells |              |             |              | CD8 <sup>+</sup> T cells |              |     |              | # of Responses <sup>a</sup> |
|-------------|--------|--------------------------|--------------|-------------|--------------|--------------------------|--------------|-----|--------------|-----------------------------|
|             |        | CD107a                   | IFN $\gamma$ | IL2         | TNF $\alpha$ | CD107a                   | IFN $\gamma$ | IL2 | TNF $\alpha$ |                             |
| B cycle 1   | 0      | 0                        | 0            | <b>2582</b> | 0            | 0                        | 0            | 0   | 2/4 (50%)    |                             |
| F cycle 1   | 0      | 0                        | <b>1391</b>  | 0           | 0            | <b>288</b>               | 0            | 0   |              |                             |
| EE cycle 1  | 4      | 0                        | 0            | 0           | 0            | 130                      | 0            | 0   |              |                             |
| OO cycle 1  | 4      | 0                        | 0            | 0           | 0            | 0                        | 0            | 0   |              |                             |
| D cycle 2   | 0      | <b>1482</b>              | 0            | 0           | 0            | 0                        | 0            | 0   | 2/6 (33%)    |                             |
| E cycle 2   | 0      | <b>1156</b>              | 0            | 0           | 0            | 0                        | 0            | 0   |              |                             |
| J cycle 2   | 1      | 0                        | 0            | 0           | 0            | 0                        | 0            | 0   |              |                             |
| M cycle 2   | 1      | 63                       | 0            | 0           | 0            | 0                        | 0            | 0   |              |                             |
| O cycle 2   | 1      | 0                        | 0            | 0           | 0            | 0                        | 0            | 0   |              |                             |
| FF cycle 2  | 4      | 0                        | 0            | 0           | 0            | 0                        | 0            | 0   |              |                             |
| A cycle 3   | 0      | 0                        | 0            | 0           | 0            | 0                        | 0            | 0   | 3/9 (33%)    |                             |
| C cycle 3   | 0      | 0                        | 0            | 0           | 0            | 0                        | 0            | 0   |              |                             |
| N cycle 3   | 1      | 0                        | 0            | 0           | 79           | <b>532</b>               | 0            | 0   |              |                             |
| LL cycle 3  | 4      | 22                       | 0            | 17          | 17           | 0                        | 0            | 0   |              |                             |
| NN cycle 3  | 4      | 0                        | 0            | 0           | 0            | 0                        | 0            | 0   |              |                             |
| PP cycle 3  | 4      | 0                        | <b>297</b>   | 0           | 0            | 0                        | 0            | 0   |              |                             |
| RR cycle 3  | 4      | 0                        | 0            | 0           | 0            | 0                        | 0            | 0   |              |                             |
| UU cycle 3  | 4      | <b>260</b>               | 128          | 0           | 0            | 0                        | 0            | 141 |              |                             |
| VV cycle 3  | 4      | 0                        | 0            | 0           | 0            | 0                        | 0            | 0   |              |                             |
| *NN cycle 5 | 4      | 87                       | 0            | 147         | <b>351</b>   | <b>2116</b>              | 0            | 0   | <b>1716</b>  | 3/3 (100%)                  |
| *PP cycle 6 | 4      | <b>2281</b>              | <b>806</b>   | 0           | 0            | 0                        | <b>27085</b> | 0   | 97           |                             |
| *UU cycle 6 | 4      | <b>460</b>               | 0            | 5           | 0            | 0                        | 0            | 0   | 0            |                             |

**Note:** Absolute # of CD4<sup>+</sup> or CD8<sup>+</sup> T cells producing cytokine or CD107a<sup>+</sup> / 1x10<sup>6</sup> cells plated at start of in vitro stimulation.

<sup>a</sup> Cytokine or CD107a in CD4<sup>+</sup> or CD8<sup>+</sup> T cells.

\* Same patient tested as previous cycle.

Numbers in bold are those positive post- vs. pre-vaccination.
